# Supplementary material
Source: PubMed Central journal article supplement (PMC522015)

# Astrartes fulgurator Complex - 10 Taxa

|         |      |      |      |      |      |      |      |      |      |      | MIN  | MEAN | MAX  | SD   |
|---------|------|------|------|------|------|------|------|------|------|------|------|------|------|------|
| BYTTNER |      | 1.11 | 3.72 | 2.24 | 1.27 | 1.43 | 1.44 | 1.6  | 1.27 | 5.89 | 1.11 | 2.22 | 5.89 | 1.60 |
| INGCUP  | 1.11 |      | 4.08 | 2.09 | 1.6  | 1.6  | 0.32 | 1.76 | 0.47 | 5.41 | 0.32 | 2.05 | 5.41 | 1.67 |
| CELT    | 3.72 | 4.08 |      | 4.56 | 3.39 | 4.22 | 4.1  | 3.57 | 3.89 | 6.58 | 3.39 | 4.23 | 6.58 | 0.95 |
| LOHAMP  | 2.24 | 2.09 | 4.56 |      | 2.4  | 2.4  | 2.1  | 2.58 | 2.56 | 6.58 | 2.09 | 3.06 | 6.58 | 1.52 |
| SENNOV  | 1.27 | 1.6  | 3.39 | 2.4  |      | 1.59 | 1.28 | 2.09 | 1.43 | 6.58 | 1.27 | 2.40 | 6.58 | 1.71 |
| LONCHO  | 1.43 | 1.6  | 4.22 | 2.4  | 1.59 |      | 1.94 | 2.09 | 1.75 | 6.41 | 1.43 | 2.60 | 6.41 | 1.66 |
| HIHAMP  | 1.44 | 0.32 | 4.1  | 2.1  | 1.28 | 1.94 |      | 2.1  | 0.48 | 5.79 | 0.32 | 2.17 | 5.79 | 1.75 |
| YESENN  | 1.6  | 1.76 | 3.57 | 2.58 | 2.09 | 2.09 | 2.1  |      | 1.93 | 5.93 | 1.6  | 2.63 | 5.93 | 1.37 |
| FABOV   | 1.27 | 0.47 | 3.89 | 2.56 | 1.43 | 1.57 | 0.48 | 1.93 |      | 5.89 | 0.47 | 2.17 | 5.89 | 1.75 |
| TRIGO   | 5.89 | 5.41 | 6.58 | 6.58 | 6.58 | 6.41 | 5.79 | 5.93 | 5.89 |      | 5.41 | 6.12 | 6.58 | 0.43 |

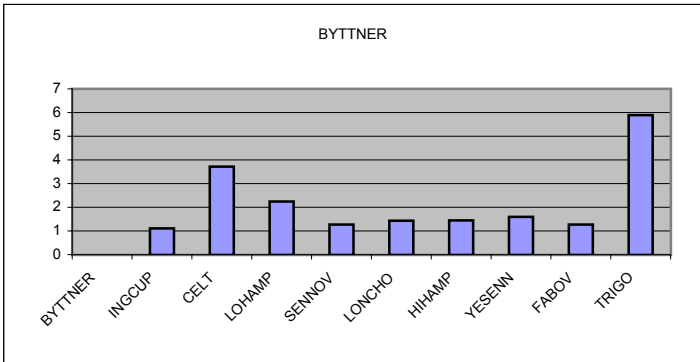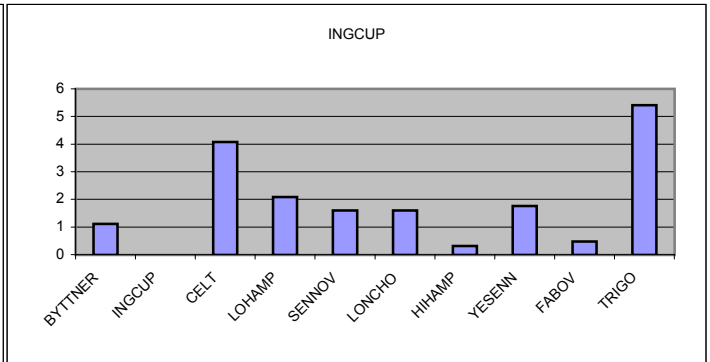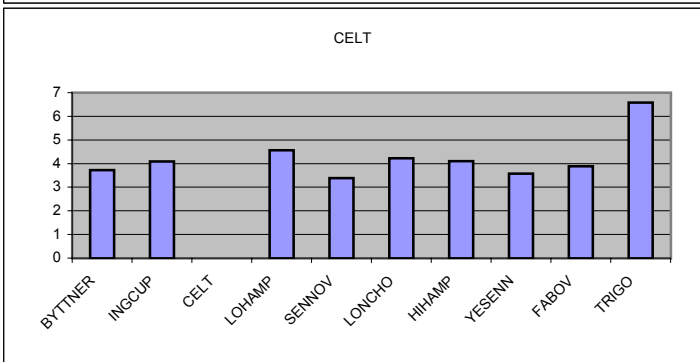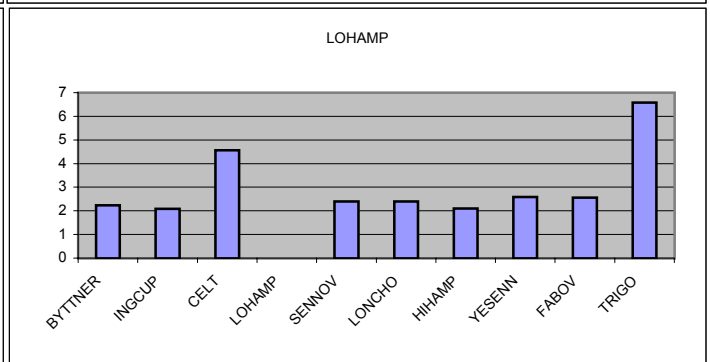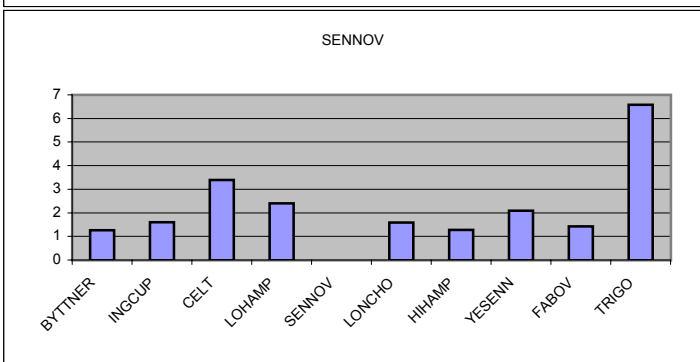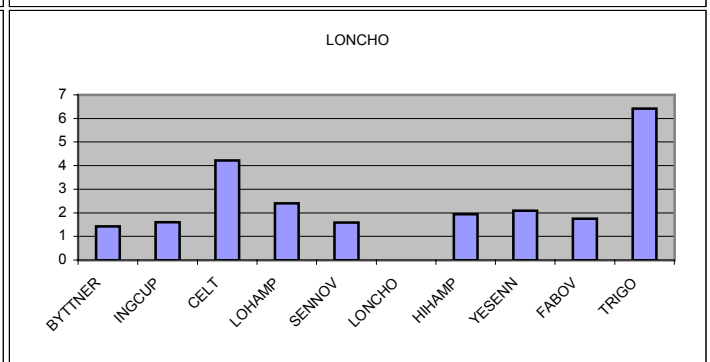

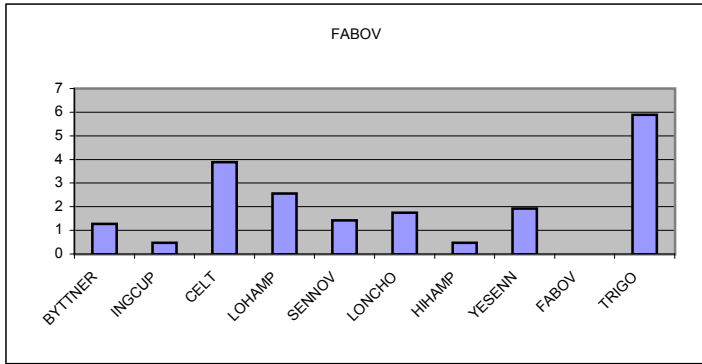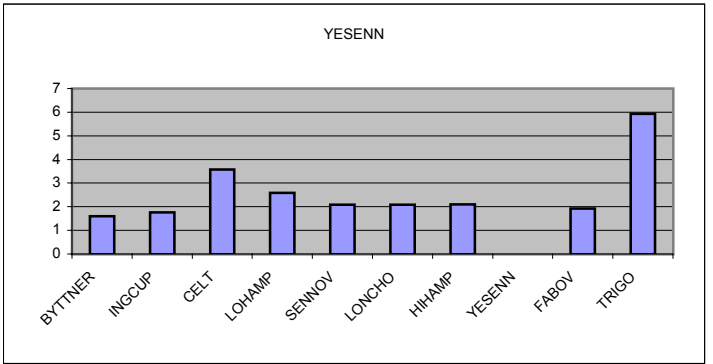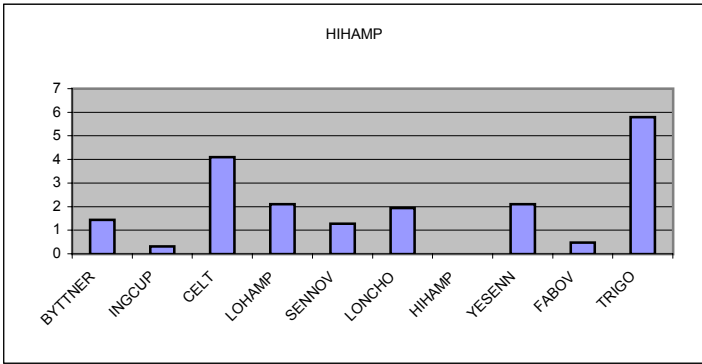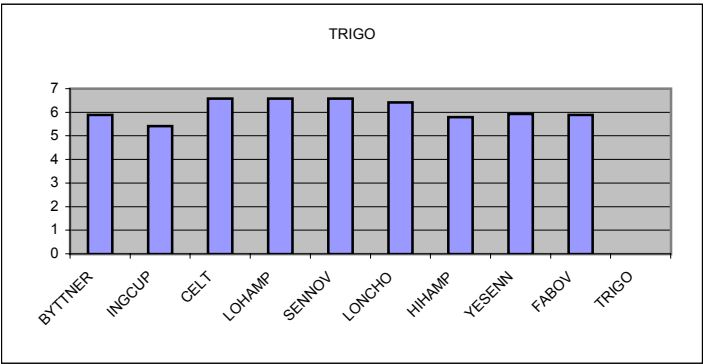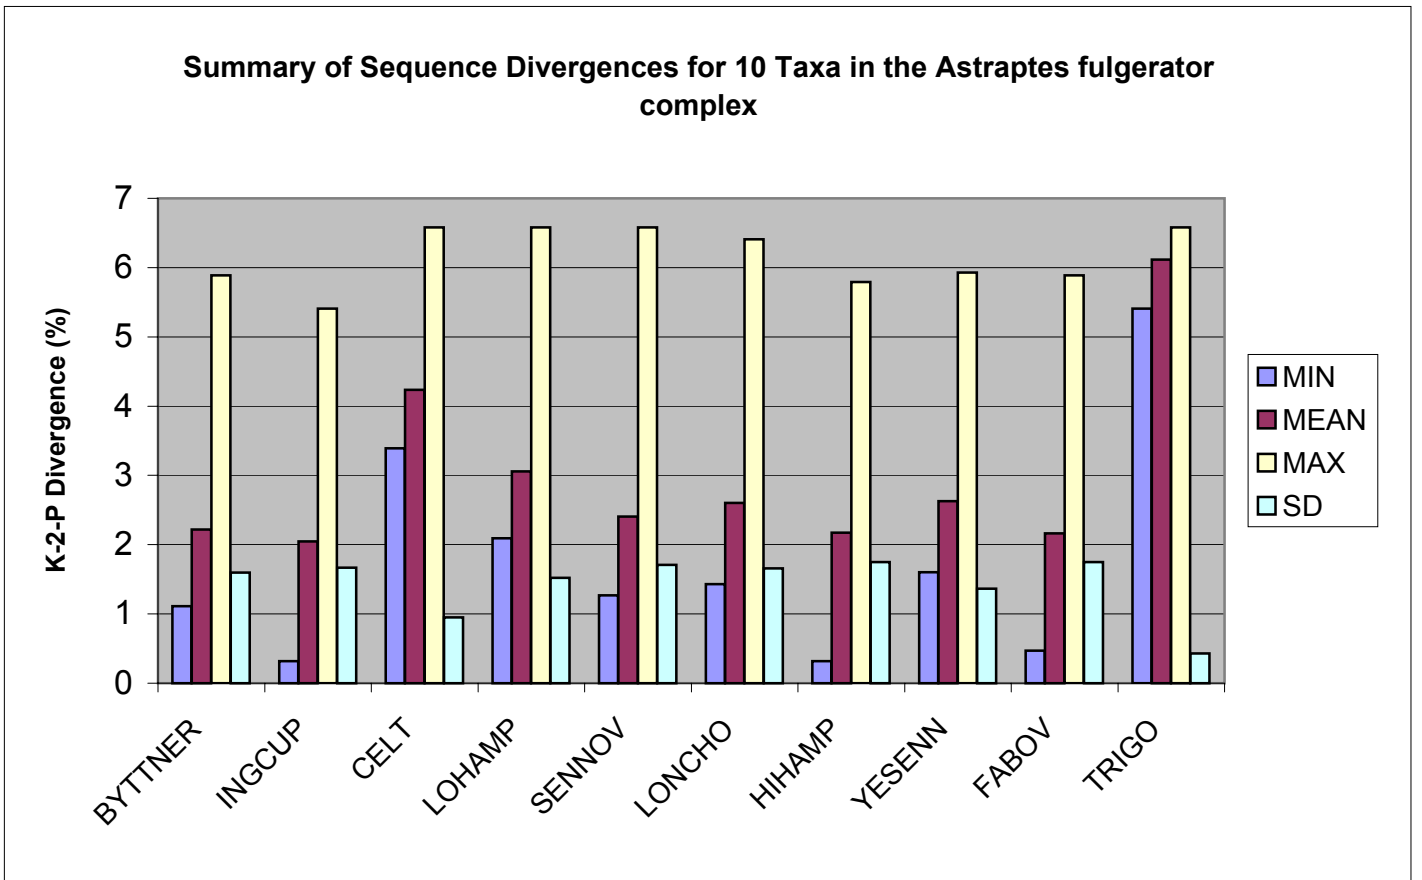

Supplement: pnas_101_41_14812__2.pdf [file pnas_101_41_14812__2.pdf]
