# Supplementary material
Source: PubMed Central journal article supplement (PMC522015)
Supplement: pnas_101_41_14812__1.pdf [file pnas_101_41_14812__1.pdf]

1%

|                      |               |                  |
|----------------------|---------------|------------------|
| Astraptes fulgerator | 02-SRNP-31761 | Trigonia laevis  |
| Astraptes fulgerator | 91-SRNP-2346  | Trigonia rugosa  |
| Astraptes fulgerator | 02-SRNP-31535 | Trigonia laevis  |
| Astraptes fulgerator | 92-SRNP-4386  | Trigonia rugosa  |
| Astraptes fulgerator | 97-SRNP-5364  | Trigonia laevis  |
| Astraptes fulgerator | 97-SRNP-5500  | Trigonia laevis  |
| Astraptes fulgerator | 02-SRNP-30290 | Trigonia laevis  |
| Astraptes fulgerator | 02-SRNP-30291 | Trigonia laevis  |
| Astraptes fulgerator | 91-SRNP-2522  | Trigonia rugosa  |
| Astraptes fulgerator | 87-SRNP-1357  | Licania arborea  |
| Astraptes fulgerator | 02-SRNP-33261 | Trigonia laevis  |
| Astraptes fulgerator | 02-SRNP-33453 | Trigonia laevis  |
| Astraptes fulgerator | 02-SRNP-33259 | Trigonia laevis  |
| Astraptes fulgerator | 02-SRNP-33260 | Trigonia laevis  |
| Astraptes fulgerator | 02-SRNP-31755 | Trigonia laevis  |
| Astraptes fulgerator | 02-SRNP-31748 | Trigonia laevis  |
| Astraptes fulgerator | 02-SRNP-31684 | Trigonia laevis  |
| Astraptes fulgerator | 02-SRNP-31621 | Trigonia rugosa  |
| Astraptes fulgerator | 02-SRNP-31620 | Trigonia rugosa  |
| Astraptes fulgerator | 02-SRNP-31539 | Trigonia laevis  |
| Astraptes fulgerator | 02-SRNP-31538 | Trigonia laevis  |
| Astraptes fulgerator | 02-SRNP-31537 | Trigonia laevis  |
| Astraptes fulgerator | 02-SRNP-31536 | Trigonia laevis  |
| Astraptes fulgerator | 02-SRNP-29103 | wild caught pupa |
| Astraptes fulgerator | 01-SRNP-9825  | Trigonia laevis  |
| Astraptes fulgerator | 01-SRNP-9111  | Trigonia laevis  |
| Astraptes fulgerator | 96-SRNP-9543  | Trigonia rugosa  |
| Astraptes fulgerator | 02-SRNP-31782 | Trigonia rugosa  |
| Astraptes fulgerator | 02-SRNP-31784 | Trigonia rugosa  |
| Astraptes fulgerator | 02-SRNP-31786 | Trigonia rugosa  |
| Astraptes fulgerator | 02-SRNP-31817 | Trigonia rugosa  |
| Astraptes fulgerator | 02-SRNP-31820 | Trigonia rugosa  |
| Astraptes fulgerator | 02-SRNP-33258 | Trigonia laevis  |
| Astraptes fulgerator | 02-SRNP-31756 | Trigonia laevis  |
| Astraptes fulgerator | 02-SRNP-31762 | Trigonia laevis  |
| Astraptes fulgerator | 91-SRNP-2576  | Trigonia rugosa  |
| Astraptes fulgerator | 91-SRNP-2631  | Trigonia rugosa  |
| Astraptes fulgerator | 91-SRNP-2694  | Trigonia rugosa  |
| Astraptes fulgerator | 92-SRNP-4372  | Trigonia rugosa  |
| Astraptes fulgerator | 92-SRNP-4379  | Trigonia rugosa  |
| Astraptes fulgerator | 92-SRNP-5726  | Trigonia rugosa  |
| Astraptes fulgerator | 93-SRNP-7152  | Trigonia rugosa  |
| Astraptes fulgerator | 93-SRNP-8663  | Trigonia rugosa  |
| Astraptes fulgerator | 97-SRNP-4485  | Trigonia rugosa  |
| Astraptes fulgerator | 97-SRNP-5173  | Trigonia rugosa  |
| Astraptes fulgerator | 97-SRNP-5199  | Trigonia rugosa  |
| Astraptes fulgerator | 97-SRNP-5215  | Trigonia laevis  |
| Astraptes fulgerator | 97-SRNP-5453  | Trigonia rugosa  |
| Astraptes fulgerator | 97-SRNP-5499  | Trigonia laevis  |
| Astraptes fulgerator | 97-SRNP-5939  | Trigonia rugosa  |
| Astraptes fulgerator | 98-SRNP-5868  | Trigonia laevis  |

**TRIGO**

|                      |                |                            |
|----------------------|----------------|----------------------------|
| Astraptes fulgerator | 98-SRNP-6516   | Inga oerstediana           |
| Astraptes fulgerator | 95-SRNP-4448   | Inga vera                  |
| Astraptes fulgerator | 95-SRNP-8692   | Cassia fistula -introduced |
| Astraptes fulgerator | 00-SRNP-20677  | Inga oerstediana           |
| Astraptes fulgerator | 97-SRNP-6203   | Cupania glabra             |
| Astraptes fulgerator | 99-SRNP-5123   | Cupania glabra             |
| Astraptes fulgerator | 99-SRNP-5917   | Cupania glabra             |
| Astraptes fulgerator | 99-SRNP-4982   | wild caught pupa           |
| Astraptes fulgerator | 99-SRNP-4985   | Cupania glabra             |
| Astraptes fulgerator | 99-SRNP-10568  | Inga vera                  |
| Astraptes fulgerator | 99-SRNP-4173   | Cupania glabra             |
| Astraptes fulgerator | 98-SRNP-6438   | wild caught pupa           |
| Astraptes fulgerator | 99-SRNP-10560  | Inga vera                  |
| Astraptes fulgerator | 97-SRNP-7160   | Inga punctata              |
| Astraptes fulgerator | 98-SRNP-6370   | Inga oerstediana           |
| Astraptes fulgerator | 97-SRNP-6595   | wild caught pupa           |
| Astraptes fulgerator | 97-SRNP-7123   | Inga oerstediana           |
| Astraptes fulgerator | 97-SRNP-6205   | Cupania glabra             |
| Astraptes fulgerator | 97-SRNP-6231   | Cupania glabra             |
| Astraptes fulgerator | 96-SRNP-9864   | wild caught pupa           |
| Astraptes fulgerator | 97-SRNP-6024   | Inga sapindoides           |
| Astraptes fulgerator | 96-SRNP-6841.1 | Inga vera                  |
| Astraptes fulgerator | 96-SRNP-934    | Inga punctata              |
| Astraptes fulgerator | 94-SRNP-4843   | Inga vera                  |
| Astraptes fulgerator | 94-SRNP-4958   | Inga vera                  |
| Astraptes fulgerator | 93-SRNP-2796   | Inga vera                  |
| Astraptes fulgerator | 94-SRNP-3011   | Inga vera                  |
| Astraptes fulgerator | 93-SRNP-2396   | Inga vera                  |
| Astraptes fulgerator | 93-SRNP-2622   | Inga vera                  |
| Astraptes fulgerator | 92-SRNP-3026   | Inga vera                  |
| Astraptes fulgerator | 92-SRNP-3121   | Inga vera                  |
| Astraptes fulgerator | 02-SRNP-9735   | Cupania glabra             |
| Astraptes fulgerator | 91-SRNP-2219   | Inga vera                  |
| Astraptes fulgerator | 02-SRNP-32206  | Inga vera                  |
| Astraptes fulgerator | 02-SRNP-9734   | Cupania glabra             |
| Astraptes fulgerator | 02-SRNP-32204  | Inga vera                  |
| Astraptes fulgerator | 02-SRNP-32205  | Inga vera                  |
| Astraptes fulgerator | 02-SRNP-29904  | wild caught pupa           |
| Astraptes fulgerator | 02-SRNP-29906  | Inga sapindoides           |
| Astraptes fulgerator | 02-SRNP-21515  | Inga oerstediana           |
| Astraptes fulgerator | 02-SRNP-24431  | Cupania glabra             |
| Astraptes fulgerator | 02-SRNP-20351  | Cupania glabra             |

**INGCUP**

|                      |               |                            |
|----------------------|---------------|----------------------------|
| Astraptes fulgerator | 02-SRNP-24431 | Cupania glabra             |
| Astraptes fulgerator | 02-SRNP-20351 | Cupania glabra             |
| Astraptes fulgerator | 02-SRNP-20353 | Cupania glabra             |
| Astraptes fulgerator | 02-SRNP-19906 | Cupania glabra             |
| Astraptes fulgerator | 02-SRNP-20092 | Inga sapindoides           |
| Astraptes fulgerator | 02-SRNP-19576 | Inga oerstediana           |
| Astraptes fulgerator | 02-SRNP-19721 | Inga oerstediana           |
| Astraptes fulgerator | 01-SRNP-947   | Inga punctata              |
| Astraptes fulgerator | 02-SRNP-19350 | Inga exalata               |
| Astraptes fulgerator | 01-SRNP-710   | Inga sapindoides           |
| Astraptes fulgerator | 01-SRNP-7881  | Inga punctata              |
| Astraptes fulgerator | 01-SRNP-508   | wild caught pupa           |
| Astraptes fulgerator | 01-SRNP-5312  | Dioclea malacocarpa        |
| Astraptes fulgerator | 01-SRNP-1389  | Inga oerstediana           |
| Astraptes fulgerator | 01-SRNP-1966  | Inga oerstediana           |
| Astraptes fulgerator | 00-SRNP-15880 | Inga vera                  |
| Astraptes fulgerator | 00-SRNP-2547  | Inga sapindoides           |
| Astraptes fulgerator | 00-SRNP-15081 | Inga vera                  |
| Astraptes fulgerator | 02-SRNP-19284 | Cupania glabra             |
| Astraptes fulgerator | 02-SRNP-20352 | Cupania glabra             |
| Astraptes fulgerator | 97-SRNP-6144  | Cupania glabra             |
| Astraptes fulgerator | 99-SRNP-4980  | Cupania glabra             |
| Astraptes fulgerator | 02-SRNP-33256 | Cupania guatemalensis      |
| Astraptes fulgerator | 97-SRNP-5640  | Inga vera                  |
| Astraptes fulgerator | 99-SRNP-13677 | Inga sapindoides           |
| Astraptes fulgerator | 04-SRNP-35081 | Hampea appendiculata       |
| Astraptes fulgerator | 04-SRNP-35067 | Hampea appendiculata       |
| Astraptes fulgerator | 99-SRNP-1215  | Capparis frondosa          |
| Astraptes fulgerator | 97-SRNP-1613  | wild caught pupa           |
| Astraptes fulgerator | 97-SRNP-1588  | wild caught pupa           |
| Astraptes fulgerator | 95-SRNP-666   | wild caught pupa           |
| Astraptes fulgerator | 02-SRNP-23035 | Hampea appendiculata       |
| Astraptes fulgerator | 01-SRNP-7374  | wild caught pupa           |
| Astraptes fulgerator | 01-SRNP-6199  | wild caught pupa           |
| Astraptes fulgerator | 00-SRNP-22183 | wild caught pupa           |
| Astraptes fulgerator | 00-SRNP-10424 | wild caught pupa           |
| Astraptes fulgerator | 01-SRNP-7327  | wild caught pupa           |
| Astraptes fulgerator | 97-SRNP-1641  | wild caught pupa           |
| Astraptes fulgerator | 97-SRNP-1804  | wild caught pupa           |
| Astraptes fulgerator | 99-SRNP-1098  | wild caught pupa           |
| Astraptes fulgerator | 99-SRNP-1220  | Capparis frondosa          |
| Astraptes fulgerator | 02-SRNP-33369 | Senna hayesiana            |
| Astraptes fulgerator | 02-SRNP-33451 | Senna papillosa            |
| Astraptes fulgerator | 90-SRNP-1632  | Inga vera                  |
| Astraptes fulgerator | 94-SRNP-678   | Desmodium glabrum          |
| Astraptes fulgerator | 92-SRNP-4645  | Inga vera                  |
| Astraptes fulgerator | 97-SRNP-5143  | Senna hayesiana            |
| Astraptes fulgerator | 97-SRNP-5060  | Senna undulata             |
| Astraptes fulgerator | 97-SRNP-5023  | Centrosema macrocarpum     |
| Astraptes fulgerator | 96-SRNP-171   | Senna hayesiana            |
| Astraptes fulgerator | 95-SRNP-9320  | Senna hayesiana            |
| Astraptes fulgerator | 95-SRNP-6871  | Senna papillosa            |
| Astraptes fulgerator | 95-SRNP-6867  | Senna papillosa            |
| Astraptes fulgerator | 95-SRNP-6103  | Senna papillosa            |
| Astraptes fulgerator | 95-SRNP-511   | Senna papillosa            |
| Astraptes fulgerator | 93-SRNP-7060  | Centrosema macrocarpum     |
| Astraptes fulgerator | 93-SRNP-6312  | Dioclea violacea           |
| Astraptes fulgerator | 92-SRNP-6023  | Canavalia brasiliensis     |
| Astraptes fulgerator | 80-SRNP-216   | Centrosema macrocarpum     |
| Astraptes fulgerator | 02-SRNP-31579 | Senna hayesiana            |
| Astraptes fulgerator | 02-SRNP-31569 | Senna hayesiana            |
| Astraptes fulgerator | 02-SRNP-28909 | Mucuna holtonii            |
| Astraptes fulgerator | 02-SRNP-13082 | Senna hayesiana            |
| Astraptes fulgerator | 02-SRNP-13079 | Centrosema plumieri        |
| Astraptes fulgerator | 97-SRNP-5926  | Senna hayesiana            |
| Astraptes fulgerator | 95-SRNP-6866  | Senna papillosa            |
| Astraptes fulgerator | 97-SRNP-5809  | Senna undulata             |
| Astraptes fulgerator | 94-SRNP-745   | Desmodium glabrum          |
| Astraptes fulgerator | 80-SRNP-160   | Senna hayesiana            |
| Astraptes fulgerator | 97-SRNP-5927  | Senna hayesiana            |
| Astraptes fulgerator | 95-SRNP-8306  | Senna hayesiana            |
| Astraptes fulgerator | 97-SRNP-5969  | Senna hayesiana            |
| Astraptes fulgerator | 94-SRNP-5469  | Senna hayesiana            |
| Astraptes fulgerator | 98-SRNP-79    | Fabaceae 13521             |
| Astraptes fulgerator | 99-SRNP-8551  | Fabaceae 13521             |
| Astraptes fulgerator | 81-SRNP-549   | Byttneria catalpaefolia    |
| Astraptes fulgerator | 95-SRNP-8044  | Byttneria catalpaefolia    |
| Astraptes fulgerator | 95-SRNP-8045  | Byttneria catalpaefolia    |
| Astraptes fulgerator | 95-SRNP-8046  | Byttneria catalpaefolia    |
| Astraptes fulgerator | 02-SRNP-8068  | wild caught pupa           |
| Astraptes fulgerator | 02-SRNP-9547  | Lonchocarpus oliganthus    |
| Astraptes fulgerator | 97-SRNP-721   | Lonchocarpus costaricensis |
| Astraptes fulgerator | 02-SRNP-8471  | Lonchocarpus oliganthus    |
| Astraptes fulgerator | 02-SRNP-8361  | Lonchocarpus oliganthus    |
| Astraptes fulgerator | 02-SRNP-8165  | Lonchocarpus oliganthus    |
| Astraptes fulgerator | 97-SRNP-840   | Lonchocarpus oliganthus    |
| Astraptes fulgerator | 99-SRNP-17068 | Senna papillosa            |
| Astraptes fulgerator | 98-SRNP-2703  | Senna hayesiana            |
| Astraptes fulgerator | 97-SRNP-842   | Lonchocarpus oliganthus    |
| Astraptes fulgerator | 97-SRNP-755   | Lonchocarpus costaricensis |
| Astraptes fulgerator | 97-SRNP-724   | Lonchocarpus costaricensis |
| Astraptes fulgerator | 97-SRNP-723   | Lonchocarpus costaricensis |
| Astraptes fulgerator | 97-SRNP-722   | Lonchocarpus costaricensis |
| Astraptes fulgerator | 97-SRNP-720   | Lonchocarpus costaricensis |
| Astraptes fulgerator | 97-SRNP-1856  | Lonchocarpus oliganthus    |
| Astraptes fulgerator | 97-SRNP-1147  | Lonchocarpus oliganthus    |

**INGCUP**

**HIHAMP**

**MYST**

**FABOV**

**BYTTNER**

**LONCHO**

|                      |               |                            |
|----------------------|---------------|----------------------------|
| Astraptes fulgerator | 97-SRNP-720   | Lonchocarpus costaricensis |
| Astraptes fulgerator | 97-SRNP-1856  | Lonchocarpus oliganthus    |
| Astraptes fulgerator | 97-SRNP-1147  | Lonchocarpus oliganthus    |
| Astraptes fulgerator | 97-SRNP-1127  | Lonchocarpus oliganthus    |
| Astraptes fulgerator | 97-SRNP-1050  | Lonchocarpus oliganthus    |
| Astraptes fulgerator | 89-SRNP-736   | Lonchocarpus oliganthus    |
| Astraptes fulgerator | 02-SRNP-9976  | Senna papillosa            |
| Astraptes fulgerator | 02-SRNP-9448  | Lonchocarpus oliganthus    |
| Astraptes fulgerator | 02-SRNP-9135  | Hampea appendiculata       |
| Astraptes fulgerator | 02-SRNP-8439  | Lonchocarpus 13669         |
| Astraptes fulgerator | 02-SRNP-8438  | Lonchocarpus 13669         |
| Astraptes fulgerator | 02-SRNP-8360  | Lonchocarpus oliganthus    |
| Astraptes fulgerator | 02-SRNP-8343  | Lonchocarpus oliganthus    |
| Astraptes fulgerator | 02-SRNP-8281  | Lonchocarpus oliganthus    |
| Astraptes fulgerator | 02-SRNP-8249  | Lonchocarpus oliganthus    |
| Astraptes fulgerator | 02-SRNP-8140  | Lonchocarpus oliganthus    |
| Astraptes fulgerator | 01-SRNP-21520 | Lonchocarpus oliganthus    |
| Astraptes fulgerator | 01-SRNP-21505 | Senna papillosa            |
| Astraptes fulgerator | 00-SRNP-9539  | Lonchocarpus 13669         |
| Astraptes fulgerator | 00-SRNP-9040  | Lonchocarpus oliganthus    |
| Astraptes fulgerator | 00-SRNP-10977 | Hampea appendiculata       |
| Astraptes fulgerator | 00-SRNP-10502 | Senna papillosa            |
| Astraptes fulgerator | 00-SRNP-10501 | Senna papillosa            |
| Astraptes fulgerator | 00-SRNP-10500 | Senna papillosa            |
| Astraptes fulgerator | 02-SRNP-24219 | Lonchocarpus oliganthus    |
| Astraptes fulgerator | 99-SRNP-17162 | Senna papillosa            |
| Astraptes fulgerator | 99-SRNP-17184 | Senna papillosa            |
| Astraptes fulgerator | 99-SRNP-17057 | Hampea appendiculata       |
| Astraptes fulgerator | 02-SRNP-8433  | Hampea appendiculata       |
| Astraptes fulgerator | 02-SRNP-9525  | Hampea appendiculata       |
| Astraptes fulgerator | 98-SRNP-6331  | Hampea appendiculata       |
| Astraptes fulgerator | 94-SRNP-10101 | Hampea appendiculata       |
| Astraptes fulgerator | 02-SRNP-9906  | Hampea appendiculata       |
| Astraptes fulgerator | 02-SRNP-9775  | Hampea appendiculata       |
| Astraptes fulgerator | 02-SRNP-9769  | Hampea appendiculata       |
| Astraptes fulgerator | 02-SRNP-8010  | Lonchocarpus oliganthus    |
| Astraptes fulgerator | 02-SRNP-7893  | Hampea appendiculata       |
| Astraptes fulgerator | 02-SRNP-7856  | Hampea appendiculata       |
| Astraptes fulgerator | 02-SRNP-23926 | Hampea appendiculata       |
| Astraptes fulgerator | 02-SRNP-23196 | Hampea appendiculata       |
| Astraptes fulgerator | 02-SRNP-23086 | Hampea appendiculata       |
| Astraptes fulgerator | 02-SRNP-19946 | Hampea appendiculata       |
| Astraptes fulgerator | 02-SRNP-19945 | Hampea appendiculata       |
| Astraptes fulgerator | 02-SRNP-19727 | Hampea appendiculata       |
| Astraptes fulgerator | 02-SRNP-19182 | Hampea appendiculata       |
| Astraptes fulgerator | 01-SRNP-7375  | wild caught pupa           |
| Astraptes fulgerator | 01-SRNP-6254  | Hampea appendiculata       |
| Astraptes fulgerator | 01-SRNP-21272 | Styrax argenteus           |
| Astraptes fulgerator | 01-SRNP-21069 | Hampea appendiculata       |
| Astraptes fulgerator | 00-SRNP-9957  | wild caught pupa           |
| Astraptes fulgerator | 00-SRNP-11876 | Hampea appendiculata       |
| Astraptes fulgerator | 00-SRNP-11725 | Hampea appendiculata       |
| Astraptes fulgerator | 97-SRNP-795   | Hampea appendiculata       |
| Astraptes fulgerator | 97-SRNP-6178  | Hampea appendiculata       |
| Astraptes fulgerator | 97-SRNP-1898  | Hampea appendiculata       |
| Astraptes fulgerator | 90-SRNP-71    | Hampea appendiculata       |
| Astraptes fulgerator | 95-SRNP-365   | Hampea appendiculata       |
| Astraptes fulgerator | 95-SRNP-867   | Hampea appendiculata       |
| Astraptes fulgerator | 97-SRNP-6757  | Hampea appendiculata       |
| Astraptes fulgerator | 99-SRNP-1403  | Hampea appendiculata       |
| Astraptes fulgerator | 98-SRNP-2607  | Hampea appendiculata       |
| Astraptes fulgerator | 98-SRNP-6256  | Hampea appendiculata       |
| Astraptes fulgerator | 95-SRNP-244   | Hampea appendiculata       |
| Astraptes fulgerator | 96-SRNP-7037  | Hampea appendiculata       |
| Astraptes fulgerator | 97-SRNP-804   | Hampea appendiculata       |
| Astraptes fulgerator | 98-SRNP-2071  | Hampea appendiculata       |
| Astraptes fulgerator | 98-SRNP-2129  | Hampea appendiculata       |
| Astraptes fulgerator | 98-SRNP-2132  | Hampea appendiculata       |
| Astraptes fulgerator | 99-SRNP-17030 | Hampea appendiculata       |
| Astraptes fulgerator | 99-SRNP-17039 | Hampea appendiculata       |
| Astraptes fulgerator | 99-SRNP-17117 | Hampea appendiculata       |
| Astraptes fulgerator | 99-SRNP-17142 | Hampea appendiculata       |
| Astraptes fulgerator | 99-SRNP-17192 | Hampea appendiculata       |
| Astraptes fulgerator | 99-SRNP-1893  | Hampea appendiculata       |
| Astraptes fulgerator | 02-SRNP-9495  | Senna papillosa            |
| Astraptes fulgerator | 95-SRNP-4551  | Senna hayesiana            |
| Astraptes fulgerator | 02-SRNP-9939  | Senna papillosa            |
| Astraptes fulgerator | 98-SRNP-7982  | Senna papillosa            |
| Astraptes fulgerator | 95-SRNP-858   | Senna papillosa            |
| Astraptes fulgerator | 02-SRNP-21442 | Dioclea malacocarpa        |
| Astraptes fulgerator | 98-SRNP-14616 | Senna papillosa            |
| Astraptes fulgerator | 01-SRNP-9652  | Senna papillosa            |
| Astraptes fulgerator | 98-SRNP-14632 | Senna papillosa            |
| Astraptes fulgerator | 02-SRNP-23365 | Senna papillosa            |
| Astraptes fulgerator | 98-SRNP-7874  | Senna papillosa            |
| Astraptes fulgerator | 98-SRNP-4773  | Senna papillosa            |
| Astraptes fulgerator | 99-SRNP-301   | Senna papillosa            |
| Astraptes fulgerator | 99-SRNP-302   | wild caught pupa           |
| Astraptes fulgerator | 00-SRNP-11188 | Dioclea malacocarpa        |
| Astraptes fulgerator | 00-SRNP-11880 | wild caught pupa           |
| Astraptes fulgerator | 00-SRNP-22164 | Senna papillosa            |
| Astraptes fulgerator | 01-SRNP-1047  | Senna papillosa            |
| Astraptes fulgerator | 01-SRNP-6896  | Senna papillosa            |
| Astraptes fulgerator | 02-SRNP-19308 | Senna papillosa            |
| Astraptes fulgerator | 02-SRNP-20190 | Senna papillosa            |
| Astraptes fulgerator | 02-SRNP-21384 | Senna papillosa            |
| Astraptes fulgerator | 02-SRNP-28865 | Senna hayesiana            |

**LONCHO**

**LOHAMP**

**YESENN**

|                      |                 |                            |
|----------------------|-----------------|----------------------------|
| Astraptes fulgerator | 02-SRNP-20190   | Senna papillosa            |
| Astraptes fulgerator | 02-SRNP-21384   | Senna papillosa            |
| Astraptes fulgerator | 02-SRNP-29805   | Senna hayesiana            |
| Astraptes fulgerator | 02-SRNP-30059   | Senna hayesiana            |
| Astraptes fulgerator | 02-SRNP-30062   | Senna hayesiana            |
| Astraptes fulgerator | 02-SRNP-30211   | Cassia grandis             |
| Astraptes fulgerator | 02-SRNP-30212   | Cassia grandis             |
| Astraptes fulgerator | 02-SRNP-31858   | Senna undulata             |
| Astraptes fulgerator | 02-SRNP-33820   | Senna hayesiana            |
| Astraptes fulgerator | 02-SRNP-9496    | Senna papillosa            |
| Astraptes fulgerator | 94-SRNP-9330    | Senna hayesiana            |
| Astraptes fulgerator | 98-SRNP-6561    | Senna papillosa            |
| Astraptes fulgerator | 99-SRNP-11      | Senna papillosa            |
| Astraptes fulgerator | 99-SRNP-12      | Senna papillosa            |
| Astraptes fulgerator | 99-SRNP-203     | Senna papillosa            |
| Astraptes fulgerator | 99-SRNP-2446    | Senna papillosa            |
| Astraptes fulgerator | 99-SRNP-3015    | Casearia sylvestris        |
| Astraptes fulgerator | 99-SRNP-386     | Senna papillosa            |
| Astraptes fulgerator | 99-SRNP-4820    | Senna papillosa            |
| Astraptes fulgerator | 95-SRNP-512     | Senna papillosa            |
| Astraptes fulgerator | 99-SRNP-402     | Senna papillosa            |
| Astraptes fulgerator | 95-SRNP-840     | Senna papillosa            |
| Astraptes fulgerator | 93-SRNP-3364    | Senna hayesiana            |
| Astraptes fulgerator | 01-SRNP-9728    | Senna papillosa            |
| Astraptes fulgerator | 00-SRNP-20862   | Senna papillosa            |
| Astraptes fulgerator | 00-SRNP-10415   | wild caught pupa           |
| Astraptes fulgerator | 02-SRNP-17335   | Dioclea 13996              |
| Astraptes fulgerator | 02-SRNP-29519   | Senna papillosa            |
| Astraptes fulgerator | 02-SRNP-31970   | Senna hayesiana            |
| Astraptes fulgerator | 02-SRNP-33384   | Senna papillosa            |
| Astraptes fulgerator | 95-SRNP-4464    | Cassia fistula -introduced |
| Astraptes fulgerator | 97-SRNP-6181    | Senna papillosa            |
| Astraptes fulgerator | 98-SRNP-15072   | Senna papillosa            |
| Astraptes fulgerator | 99-SRNP-4773    | Senna papillosa            |
| Astraptes fulgerator | 99-SRNP-17158   | Senna papillosa            |
| Astraptes fulgerator | 02-SRNP-19921   | Senna papillosa            |
| Astraptes fulgerator | 02-SRNP-18849   | Senna papillosa            |
| Astraptes fulgerator | 02-SRNP-29803   | Senna hayesiana            |
| Astraptes fulgerator | 99-SRNP-4436    | Senna papillosa            |
| Astraptes fulgerator | 99-SRNP-4383    | wild caught pupa           |
| Astraptes fulgerator | 99-SRNP-155     | wild caught pupa           |
| Astraptes fulgerator | 98-SRNP-7848    | Senna papillosa            |
| Astraptes fulgerator | 98-SRNP-6332    | Senna papillosa            |
| Astraptes fulgerator | 98-SRNP-2712    | Senna papillosa            |
| Astraptes fulgerator | 98-SRNP-15015   | Senna papillosa            |
| Astraptes fulgerator | 97-SRNP-6252    | Senna papillosa            |
| Astraptes fulgerator | 02-SRNP-19922   | Senna papillosa            |
| Astraptes fulgerator | 02-SRNP-19802   | Senna papillosa            |
| Astraptes fulgerator | 01-SRNP-6800    | Senna papillosa            |
| Astraptes fulgerator | 00-SRNP-22003   | Senna papillosa            |
| Astraptes fulgerator | 00-SRNP-11805   | Dioclea malacocarpa        |
| Astraptes fulgerator | 98-SRNP-6537    | Senna papillosa            |
| Astraptes fulgerator | 89-SRNP-112     | Senna papillosa            |
| Astraptes fulgerator | 95-SRNP-4402    | Senna hayesiana            |
| Astraptes fulgerator | 99-SRNP-2444    | Senna papillosa            |
| Astraptes fulgerator | 99-SRNP-4418    | Senna papillosa            |
| Astraptes fulgerator | 99-SRNP-524     | Senna papillosa            |
| Astraptes fulgerator | 99-SRNP-525     | Senna papillosa            |
| Astraptes fulgerator | 01-SRNP-2604    | wild caught pupa           |
| Astraptes fulgerator | 91-SRNP-2454    | Karwinskia calderoni       |
| Astraptes fulgerator | 91-SRNP-1741    | Karwinskia calderoni       |
| Astraptes fulgerator | 90-SRNP-1711    | Senna hayesiana            |
| Astraptes fulgerator | 92-SRNP-3975    | Senna hayesiana            |
| Astraptes fulgerator | 92-SRNP-3975.1  | Senna hayesiana            |
| Astraptes fulgerator | 93-SRNP-3363    | Senna hayesiana            |
| Astraptes fulgerator | 93-SRNP-3377    | Senna hayesiana            |
| Astraptes fulgerator | 94-SRNP-8089    | Senna papillosa            |
| Astraptes fulgerator | 95-SRNP-6137    | Senna hayesiana            |
| Astraptes fulgerator | 96-SRNP-10407   | Canavalia brasiliensis     |
| Astraptes fulgerator | 96-SRNP-10408   | Canavalia brasiliensis     |
| Astraptes fulgerator | 96-SRNP-10409   | Canavalia brasiliensis     |
| Astraptes fulgerator | 96-SRNP-10410   | Canavalia brasiliensis     |
| Astraptes fulgerator | 99-SRNP-10683.1 | Canavalia brasiliensis     |
| Astraptes fulgerator | 95-SRNP-4409    | Senna hayesiana            |
| Astraptes fulgerator | 95-SRNP-8555    | Cassia fistula -introduced |
| Astraptes fulgerator | 98-SRNP-2493    | Senna papillosa            |
| Astraptes fulgerator | 99-SRNP-17188   | Senna papillosa            |
| Astraptes fulgerator | 93-SRNP-954     | Senna hayesiana            |
| Astraptes fulgerator | 93-SRNP-955     | Senna hayesiana            |
| Astraptes fulgerator | 99-SRNP-413     | Senna papillosa            |
| Astraptes fulgerator | 99-SRNP-412     | Senna papillosa            |
| Astraptes fulgerator | 99-SRNP-411     | Senna papillosa            |
| Astraptes fulgerator | 99-SRNP-409     | Senna papillosa            |
| Astraptes fulgerator | 99-SRNP-403     | Senna papillosa            |
| Astraptes fulgerator | 99-SRNP-207     | Senna papillosa            |
| Astraptes fulgerator | 98-SRNP-2714    | Senna papillosa            |
| Astraptes fulgerator | 96-SRNP-9061    | Senna hayesiana            |
| Astraptes fulgerator | 96-SRNP-8797    | Canavalia brasiliensis     |
| Astraptes fulgerator | 96-SRNP-8770    | Canavalia brasiliensis     |
| Astraptes fulgerator | 96-SRNP-10154   | Karwinskia calderoni       |
| Astraptes fulgerator | 95-SRNP-9333    | Senna hayesiana            |
| Astraptes fulgerator | 95-SRNP-8643    | Cassia fistula -introduced |
| Astraptes fulgerator | 95-SRNP-6869    | Senna papillosa            |
| Astraptes fulgerator | 95-SRNP-6474    | Senna hayesiana            |
| Astraptes fulgerator | 95-SRNP-6435    | Karwinskia calderoni       |
| Astraptes fulgerator | 95-SRNP-4807    | Senna papillosa            |

**YESENN**

**SENNOV**

|                       |                |                         |
|-----------------------|----------------|-------------------------|
| Astraptres fulgerator | 95-SRNP-0174   | Senna hayesiana         |
| Astraptres fulgerator | 95-SRNP-6435   | Karwinskia calderoni    |
| Astraptres fulgerator | 95-SRNP-4807   | Senna papillosa         |
| Astraptres fulgerator | 95-SRNP-4533   | Senna hayesiana         |
| Astraptres fulgerator | 94-SRNP-5256   | Senna hayesiana         |
| Astraptres fulgerator | 93-SRNP-7728   | Senna pallida           |
| Astraptres fulgerator | 93-SRNP-6311   | Cassia emarginata       |
| Astraptres fulgerator | 93-SRNP-5558.1 | Centrosema plumieri     |
| Astraptres fulgerator | 93-SRNP-4147   | Cassia emarginata       |
| Astraptres fulgerator | 93-SRNP-3701   | Centrosema plumieri     |
| Astraptres fulgerator | 93-SRNP-3603.2 | Centrosema plumieri     |
| Astraptres fulgerator | 93-SRNP-2208   | Senna hayesiana         |
| Astraptres fulgerator | 93-SRNP-2206   | Senna hayesiana         |
| Astraptres fulgerator | 93-SRNP-2201   | Senna hayesiana         |
| Astraptres fulgerator | 93-SRNP-1025   | Senna hayesiana         |
| Astraptres fulgerator | 89-SRNP-23     | Piscidia carthagenensis |
| Astraptres fulgerator | 02-SRNP-31141  | Senna hayesiana         |
| Astraptres fulgerator | 02-SRNP-13089  | Senna hayesiana         |
| Astraptres fulgerator | 02-SRNP-13088  | Senna hayesiana         |
| Astraptres fulgerator | 02-SRNP-13087  | Senna hayesiana         |
| Astraptres fulgerator | 02-SRNP-13086  | Senna hayesiana         |
| Astraptres fulgerator | 02-SRNP-13085  | Senna hayesiana         |
| Astraptres fulgerator | 99-SRNP-399    | Senna papillosa         |
| Astraptres fulgerator | 96-SRNP-8773   | Canavalia brasiliensis  |
| Astraptres fulgerator | 92-SRNP-69     | Senna hayesiana         |
| Astraptres fulgerator | 96-SRNP-812    | Senna hayesiana         |
| Astraptres fulgerator | 99-SRNP-410    | Senna papillosa         |
| Astraptres fulgerator | 92-SRNP-70     | Senna hayesiana         |
| Astraptres fulgerator | 91-SRNP-3005   | Senna hayesiana         |
| Astraptres fulgerator | 95-SRNP-6475   | Senna hayesiana         |
| Astraptres fulgerator | 95-SRNP-6476   | Senna hayesiana         |
| Astraptres fulgerator | 92-SRNP-5660   | Senna hayesiana         |
| Astraptres fulgerator | 92-SRNP-4398   | Senna hayesiana         |
| Astraptres fulgerator | 98-SRNP-3453   | Senna hayesiana         |
| Astraptres fulgerator | 96-SRNP-8802   | Canavalia brasiliensis  |
| Astraptres fulgerator | 96-SRNP-6857   | Senna hayesiana         |
| Astraptres fulgerator | 95-SRNP-9776   | Senna cobanensis        |
| Astraptres fulgerator | 95-SRNP-6898   | Senna hayesiana         |
| Astraptres fulgerator | 93-SRNP-4424   | Cassia emarginata       |
| Astraptres fulgerator | 93-SRNP-4243   | Cassia emarginata       |
| Astraptres fulgerator | 93-SRNP-4197   | Cassia emarginata       |
| Astraptres fulgerator | 93-SRNP-4145   | Cassia emarginata       |
| Astraptres fulgerator | 93-SRNP-3656   | Senna alata -introduced |
| Astraptres fulgerator | 93-SRNP-3655   | Senna alata -introduced |
| Astraptres fulgerator | 93-SRNP-2675   | Senna hayesiana         |
| Astraptres fulgerator | 91-SRNP-3001   | Senna hayesiana         |
| Astraptres fulgerator | 91-SRNP-2719   | Cassia emarginata       |
| Astraptres fulgerator | 91-SRNP-2715   | Senna hayesiana         |
| Astraptres fulgerator | 02-SRNP-32463  | Senna hayesiana         |
| Astraptres fulgerator | 96-SRNP-6858   | Senna hayesiana         |
| Astraptres fulgerator | 96-SRNP-6859   | Senna hayesiana         |
| Astraptres fulgerator | 95-SRNP-6899   | Senna hayesiana         |
| Astraptres fulgerator | 93-SRNP-3603.1 | Centrosema plumieri     |
| Astraptres fulgerator | 93-SRNP-4199   | Cassia emarginata       |
| Astraptres fulgerator | 97-SRNP-2577   | Cassia emarginata       |
| Astraptres fulgerator | 96-SRNP-6857.1 | Senna hayesiana         |
| Astraptres fulgerator | 95-SRNP-4651   | Cassia emarginata       |
| Astraptres fulgerator | 93-SRNP-4146   | Cassia emarginata       |
| Astraptres fulgerator | 95-SRNP-10951  | Karwinskia calderoni    |
| Astraptres fulgerator | 97-SRNP-2576   | Cassia emarginata       |
| Astraptres fulgerator | 97-SRNP-2578   | Cassia emarginata       |
| Astraptres fulgerator | 99-SRNP-2445   | Senna papillosa         |
| Astraptres fulgerator | 99-SRNP-401    | Senna papillosa         |
| Astraptres fulgerator | 91-SRNP-3045   | Senna hayesiana         |
| Astraptres fulgerator | 02-SRNP-34560  | wild caught pupa        |
| Astraptres fulgerator | 91-SRNP-2501   | Senna hayesiana         |
| Astraptres fulgerator | 96-SRNP-8769   | Canavalia brasiliensis  |
| Astraptres fulgerator | 99-SRNP-4144   | wild caught pupa        |
| Astraptres fulgerator | 02-SRNP-13284  | Cupania guatemalensis   |
| Astraptres fulgerator | 00-SRNP-11386  | Dioclea malacocarpa     |
| Astraptres fulgerator | 93-SRNP-2680   | Senna hayesiana         |
| Astraptres fulgerator | 94-SRNP-6452   | Dioclea violacea        |
| Astraptres fulgerator | 02-SRNP-31136  | Celtis iguanaea         |
| Astraptres fulgerator | 02-SRNP-31493  | Celtis iguanaea         |
| Astraptres fulgerator | 02-SRNP-29799  | Celtis iguanaea         |
| Astraptres fulgerator | 97-SRNP-9604   | Celtis iguanaea         |
| Astraptres fulgerator | 96-SRNP-226    | Celtis iguanaea         |
| Astraptres fulgerator | 02-SRNP-29082  | Celtis iguanaea         |
| Astraptres fulgerator | 02-SRNP-31741  | Celtis iguanaea         |
| Astraptres fulgerator | 02-SRNP-30241  | Celtis iguanaea         |
| Astraptres fulgerator | 02-SRNP-29798  | Celtis iguanaea         |
| Astraptres fulgerator | 02-SRNP-29083  | Celtis iguanaea         |
| Astraptres fulgerator | 02-SRNP-29080  | Celtis iguanaea         |
| Astraptres fulgerator | 02-SRNP-29054  | Celtis iguanaea         |
| Astraptres fulgerator | 01-SRNP-1413   | Celtis iguanaea         |
| Astraptres fulgerator | 02-SRNP-31377  | Celtis iguanaea         |
| Astraptres fulgerator | 02-SRNP-31738  | Celtis iguanaea         |
| Astraptres fulgerator | 02-SRNP-31739  | Celtis iguanaea         |
| Astraptres fulgerator | 02-SRNP-31745  | Celtis iguanaea         |
| Astraptres fulgerator | 02-SRNP-33002  | Celtis iguanaea         |
| Astraptres fulgerator | 02-SRNP-33016  | Celtis iguanaea         |
| Astraptres fulgerator | 02-SRNP-33197  | Celtis iguanaea         |
| Astraptres fulgerator | 94-SRNP-9389   | Celtis iguanaea         |
| Astraptres fulgerator | 96-SRNP-227    | Celtis iguanaea         |
| Astraptres fulgerator | 99-SRNP-5312   | wild caught pupa        |

**SENNOV**

**NUMT**

**CELT**
